# Supplementary material for: Human neuromuscular junction on micro-structured microfluidic devices implemented with a custom micro electrode array (MEA)
Source: Royal Society of Chemistry journal article supplement (doi:10.1039/d1lc00497b), 2021-01-01
Supplement: d1lc00497b1.pdf [file d1lc00497b1.pdf]

## Electronic Supplementary Information (ESI) for Lab on a Chip

### Human neuromuscular junction on micro-structured microfluidic devices implemented with a custom Micro Electrode Array (MEA)

Pauline Duc,<sup>\*a</sup> Michel Vignes,<sup>b</sup> Gérald Hugon,<sup>c</sup> Audrey Sebban,<sup>d</sup> Gilles Carnac,<sup>c</sup> Eugene Malyshev,<sup>d</sup> Benoît Charlot,<sup>d</sup> and Florence Rage<sup>\*a</sup>

<sup>a</sup> IGMM, University of Montpellier, CNRS, Montpellier, France

<sup>b</sup> IBMM UMR5247, University of Montpellier, CNRS, Montpellier, France.

<sup>c</sup> PhyMedExp, INSERM U1046, CNRS UMR9214, Université de Montpellier, Montpellier, France.

<sup>d</sup> IES, CNRS University of Montpellier, Montpellier 34095, France.

\* Correspondence: pauline.duc@igmm.cnrs.fr, florence.rage@igmm.cnrs.fr

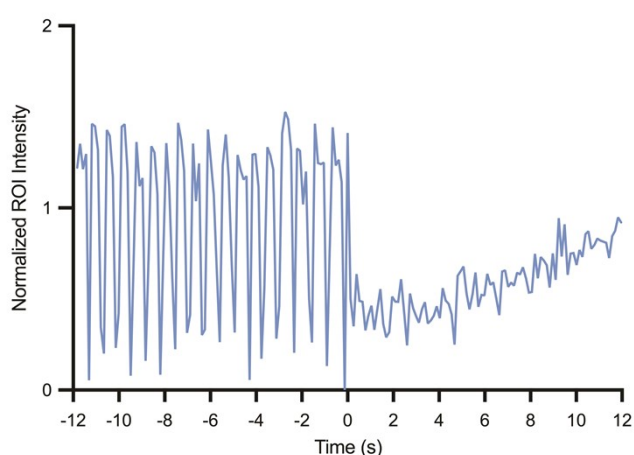

Figure S1: Effect of TTX on muscle contraction to assess NMJ functionality. Normalized intensity time plot for a time-lapse movie of an innervated myotube before and after TTX treatment (0 represent the start of treatment).

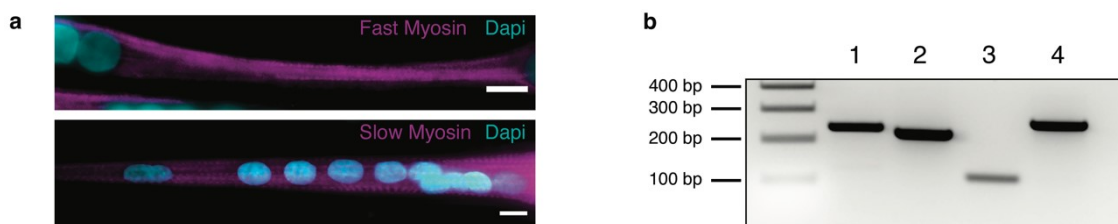

Figure S2: Characterization of myoblast fibers obtained after differentiation and co-culture with motor neurons. The culture was a mix of fast myosin- and slow myosin-positive staining (a). RT-PCR showed expression of human MYH1 gene (lane 1 – 240bp), MYH2 gene (lane 2 – 225bp), MYH4 gene (lane 3 – 110bp) and MYH7 (lane 4 – 270bp), respectively expressed in type I, IIa, IIb and IIx fibers (b). Scale bar 10 $\mu$ m.
